# Supplementary material
Source: ML conference proceedings conference paper supplement (https://proceedings.neurips.cc/paper_files/paper/2022/hash/04cda3a5ef307978cb5dbef6ab649380-Abstract.html)
Supplement: Supplementary file 1 [file 04cda3a5ef307978cb5dbef6ab649380-Supplemental-Conference.zip]

Archive with 3 entries (2 files):
- supplementary/
- supplementary/Early_OPT_NeurIPS_2022.pdf
- __MACOSX/supplementary/._Early_OPT_NeurIPS_2022.pdf
